# Supplementary material
Source: PubMed Central journal article supplement (PMC3091228)
Supplement: supp_M111.228163_Suppdata.pdf [file supp_M111.228163_Suppdata.pdf]

**STRUCTURAL BASIS OF RECOGNITION OF PATHOGEN-ASSOCIATED MOLECULAR PATTERNS AND INHIBITION OF PRO-INFLAMMATORY CYTOKINES BY CAMEL PEPTIDOGLYCAN RECOGNITION PROTEIN**

Pradeep Sharma<sup>1</sup>, Divya Dube<sup>1</sup>, Amar Singh<sup>2</sup>, Biswajit Mishra<sup>1</sup>, Nagendra Singh<sup>1</sup>, Mau Sinha<sup>1</sup>, Sharmistha Dey<sup>1</sup>, Punit Kaur<sup>1</sup>, Dipendra K. Mitra<sup>2</sup>, Sujata Sharma<sup>1</sup> and Tej P. Singh<sup>1\*</sup>

<sup>1</sup>Department of Biophysics, <sup>2</sup>Department of Transplantation Immunology and Immunogenetics, All India Institute of Medical Sciences, New Delhi - 110029, India.

**Running title:** Structural basis of recognition of PAMPs by PGRP-S

**Keywords:** PGRP-S, PAMPs, Crystal structure, Innate immunity, Peptidoglycan, Lipopolysaccharide, Lipoteichoic acid

**Abbreviations:** CPGRP-S, Camel peptidoglycan recognition protein-S; PMMPs, Pathogen-associated molecular patterns; LPS, Lipopolysaccharide; LTA, Lipoteichoic acid; PGN, Peptidoglycan.

**\*Author for correspondence:**

T. P. Singh  
Department of Biophysics  
All India Institute of Medical Sciences  
Ansari Nagar, New Delhi – 110 029  
India  
Tel : +91-11-2658-8931  
FAX: +91-11-2658-8663  
E-mail: [tpsingh.aiims@gmail.com](mailto:tpsingh.aiims@gmail.com)

## LEGENDS TO FIGURES

**Figure S1.** (a) Effect of the concentrations on the quenching of fluorescence. The fluorescence intensities are plotted for various concentrations of (A) LPS and (B) LTA. (b) The binding curves drawn for percentage quenching ( $Q = F_0 - F_c / F_0$ )% against ligand/protein molar ratios for (A) LPS and (B) LTA.

**Figure S2.** The SPR-sensograms for the bindings of (A) LPS and (B) LTA with CPGRP-S. The protein was immobilized on the chip and the increasing concentrations (1.4 mM, 2.5 mM and 5.0 mM) of ligands LPS and LTA were used in mobile phase in separate experiments corresponding to curves a, b and c.

**Figure S3.** Effect of PGRP on the survival rate of mice after LPS-induced septic shock. Survival graph: 8 weeks old mice were injected intra-peritoneally with lethal dose of LPS (30 mg/kg) only (blue) and PGRP-LPS group were given LPS (30 mg/kg) prior to administering CPGRP (10 mg/kg) (red). The percentage of mice survival was analyzed, and the log-rank *t* test *P* values were calculated.

**Figure S4.** Sequence alignment of PGRP-S from various species performed with clustal W. The critical residues at the interfaces of molecules A and B (green), A and C (cyan) and C and D (red) are indicated. Cysteine residues shown in yellow colour. (The abbreviations: CPGRP-S for camel, BPGRP-S for bovine, HPGRP-S for human, MPGRP-S for mouse, RPGRP-S for rat and DPGRP-S for drosophila)

**Figure S1**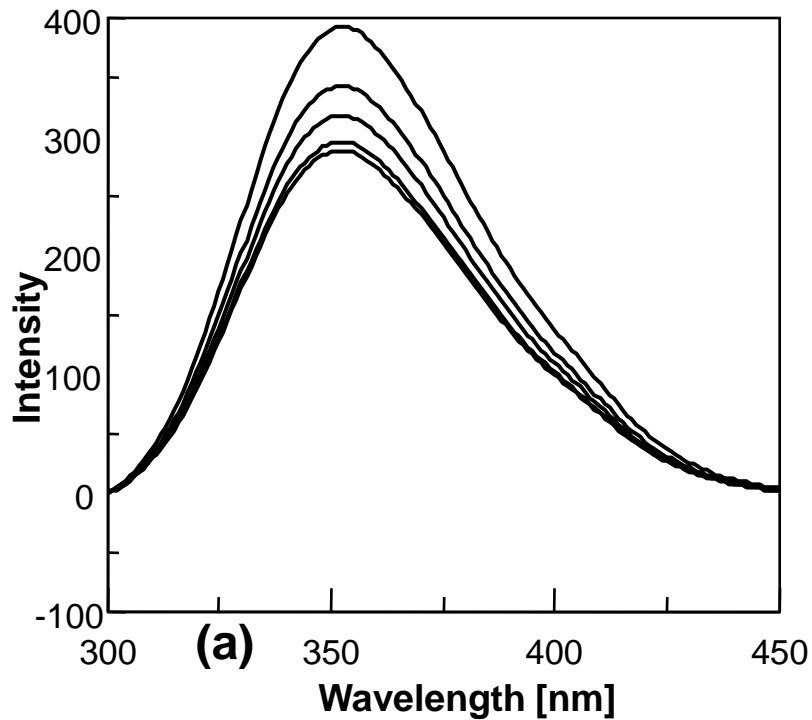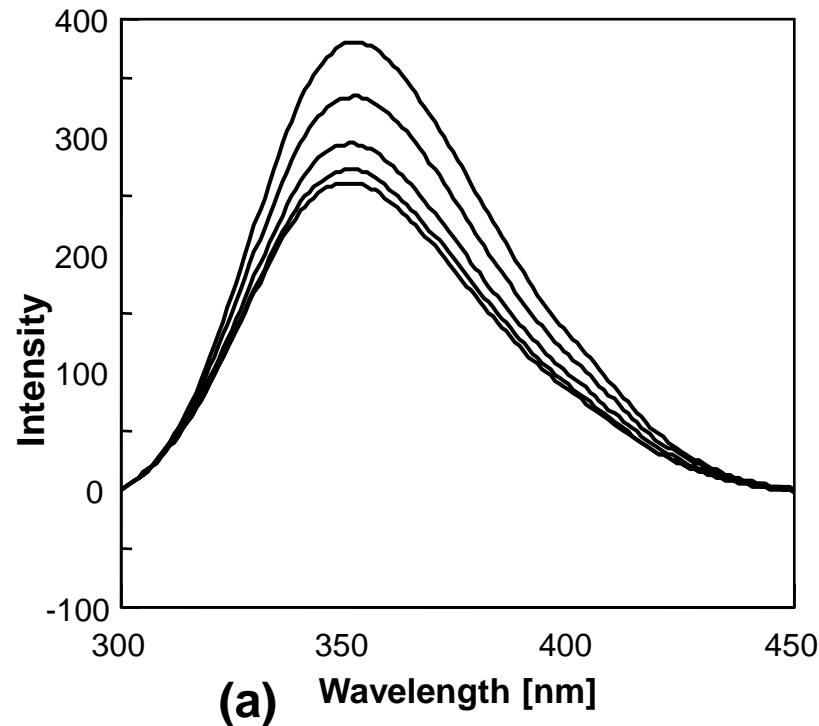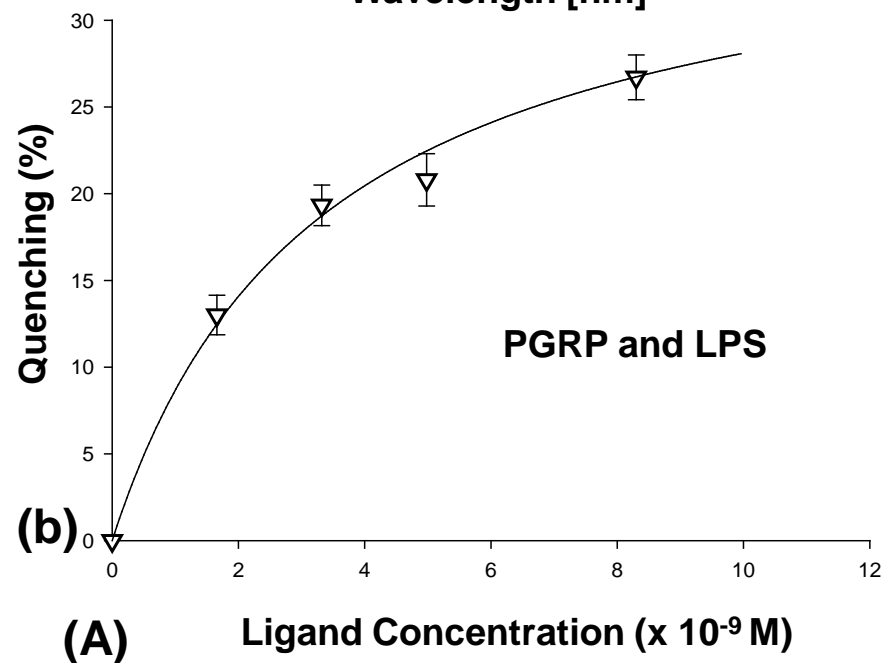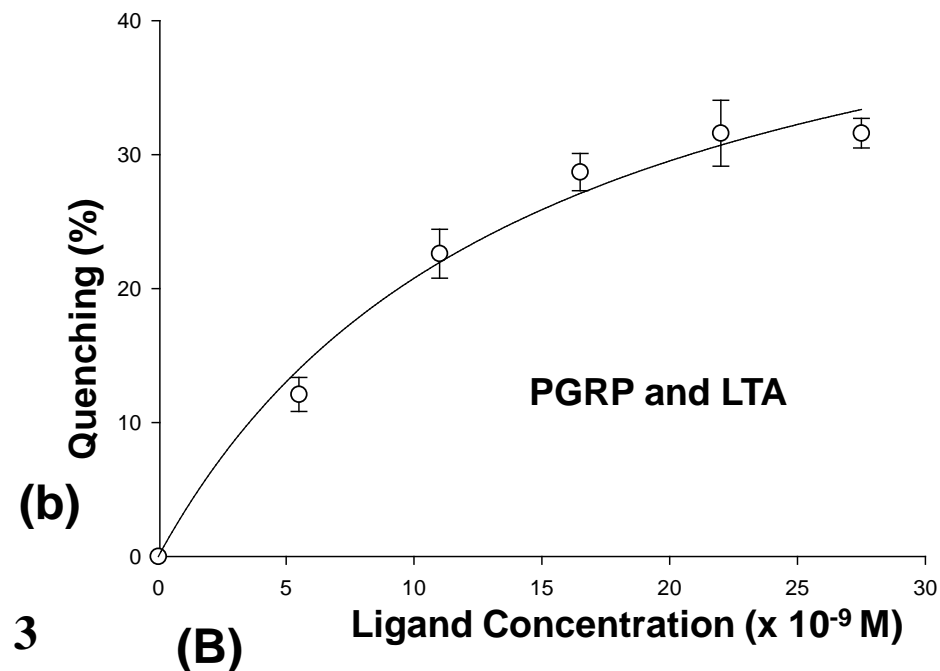

**Figure S2**

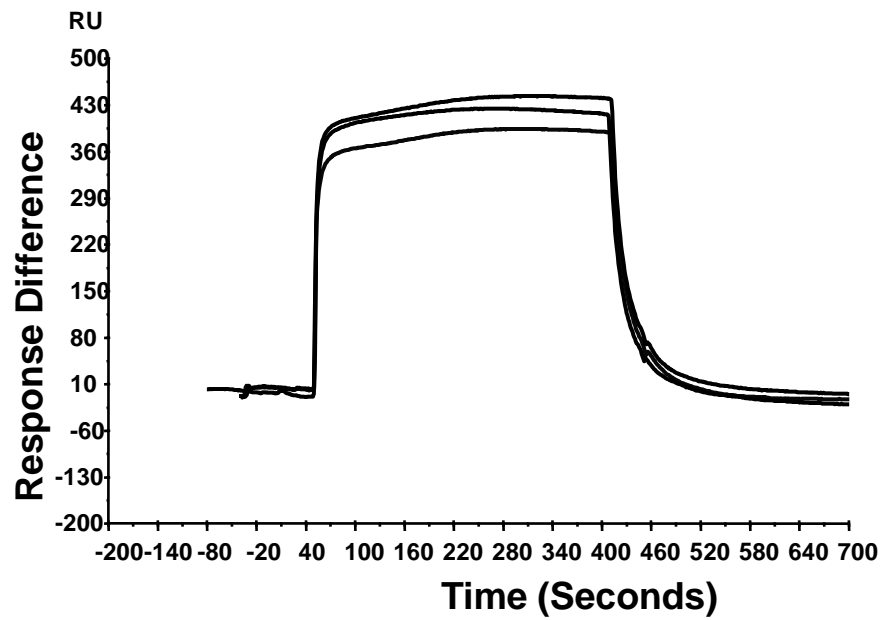

**(A)**

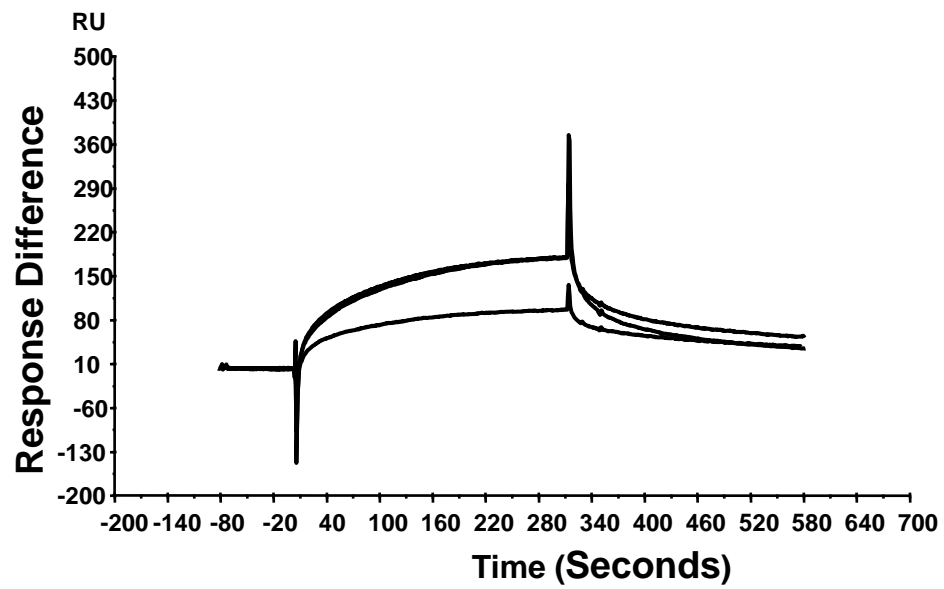

**(B)**

**Figure S3**

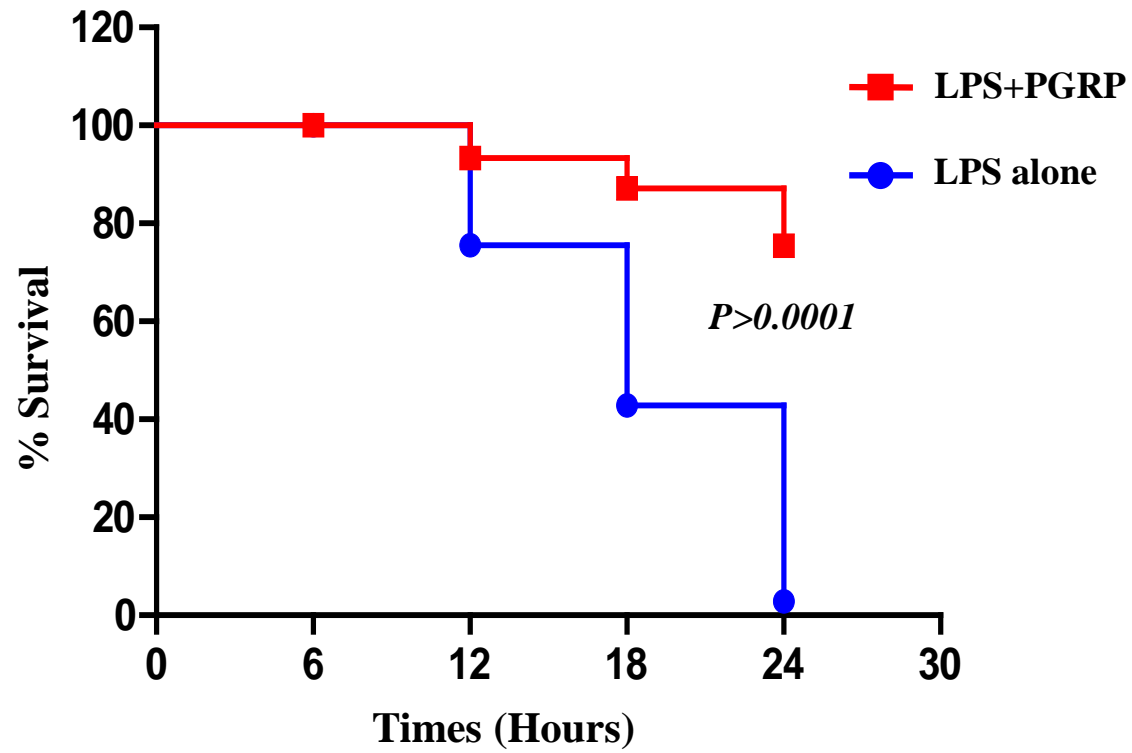

Figure S4

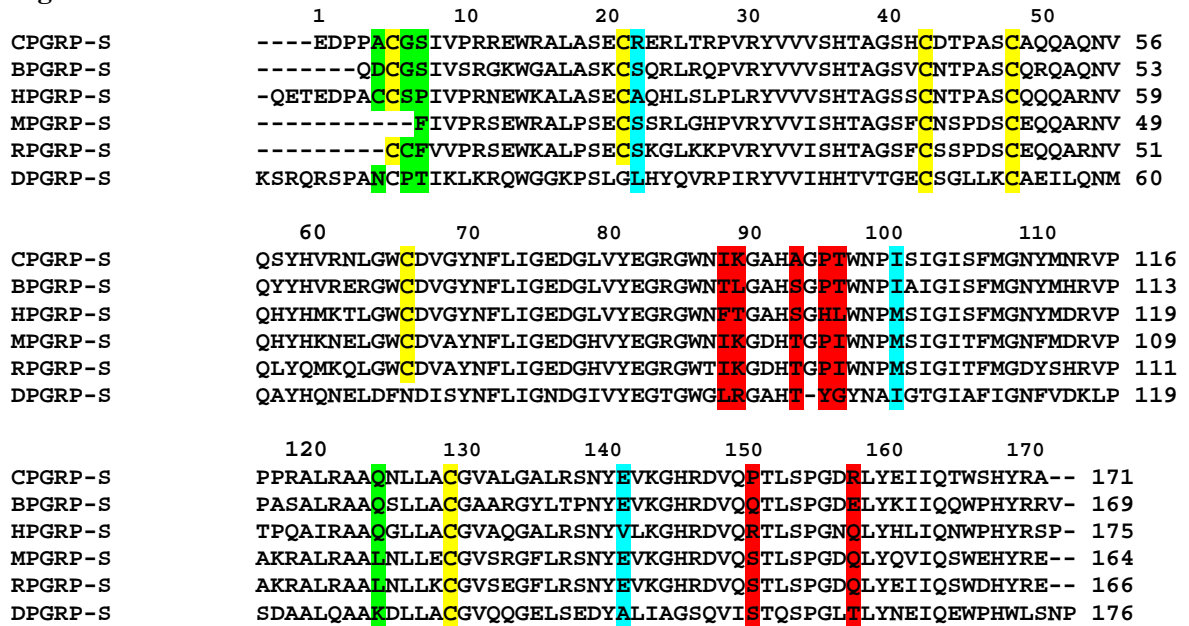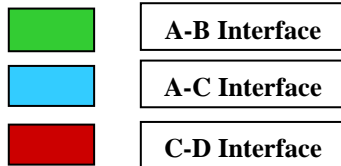

**Table S1: Hydrogen bond distances (Å) between protein and LPS atoms. The alphabets in the parentheses indicate chain identifications.**

| Protein Atoms   | Water Oxygen | LPS Atoms | Distance (Å) |
|-----------------|--------------|-----------|--------------|
| (A) Arg 170 Nε  |              | O6        | 3.3          |
|                 | W207 (A)     | O6        | 3.1          |
| (A) Glu 142 Oε2 | W207 (A)     |           | 2.8          |
|                 | W209 (C)     | O46       | 2.5          |
| (C) Pro 96 O    | W209 (C)     |           | 2.8          |
| (C) Pro 96 O    |              | O46       | 3.3          |
| (C) Asn 99 Nδ2  |              | O46       | 3.3          |
| (C) Gly 95 O    |              | O46       | 3.4          |
|                 | W209 (C)     | O47       | 3.2          |
|                 | W296 (C)     | O47       | 3.4          |
| (C) Trp 66 Nε1  |              | O4        | 3.0          |
|                 | W179 (C)     | O4        | 2.7          |
| (C) Arg 85 NH2  | W179 (C)     |           | 2.9          |
| (C) Lys 90 Nζ   |              | O48       | 2.8          |
|                 | W260 (C)     | O48       | 2.5          |
|                 | W260 (C)     | O5        | 2.5          |
| (C) Lys 90 Nζ   | W260 (C)     |           | 2.5          |
| (C) Gly 91 O    | W260 (C)     |           | 2.7          |
| (C) Ala 92 O    |              | O7        | 3.4          |
| (C) His 93 N    |              | O7        | 3.0          |
| (C) Asn 99 Nδ2  |              | O7        | 2.7          |
| (C) Asn 99 Nδ2  |              | O1        | 2.5          |
|                 | W179 (D)     | O42       | 3.2          |
| (D) Thr 97 N    | W179 (D)     |           | 2.8          |
| (D) Thr 97 N    |              | O42       | 3.2          |
| (D) Thr 97 Oγ1  |              | O42       | 2.5          |
| (D) Val 149 O   |              | O43       | 2.5          |
| (D) Gln 150 Nε2 |              | O43       | 2.5          |
|                 | W179 (D)     | O43       | 2.9          |
| (D) Gln 150 Nε2 |              | O3        | 3.4          |
|                 | W325 (C)     | N2        | 3.4          |
| (D) Gln 150 Oε1 | W325 (C)     |           | 2.9          |

**Table S2: Hydrogen bond distances (Å) between protein and LTA atoms. The alphabets in the parentheses indicate chain identifications.**

| Protein Atoms   | Water Oxygen | LPS Atoms | Distance (Å) |
|-----------------|--------------|-----------|--------------|
| (A) Asn 140 Nδ2 |              | O9        | 2.8          |
|                 | W310 (A)     | O13       | 3.3          |
| (A) Ser 139 Oγ  | W310 (A)     |           | 3.0          |
| (C) Asn 99 Nδ2  |              | O2        | 2.8          |
| (C) Gly 95 N    |              | O2        | 3.4          |
| (C) Asn 99 Nδ2  |              | O4        | 2.9          |
|                 | W174 (C)     | O4        | 2.7          |
|                 | W224 (C)     | O4        | 3.3          |
| (C) Lys 90 Nζ   | W224 (C)     |           | 2.7          |
| (C) His 93 O    |              | N42       | 3.2          |
|                 | W322 (C)     | O5        | 3.0          |
| (C) Arg 85 NH2  | W322 (C)     |           | 2.6          |
| (C) His 93 N    |              | O41       | 3.4          |
| (C) Ala 92 O    |              |           | 3.2          |
| (C) Gln150 Nε2  |              | N44       | 3.1          |
| (D) Gln150 Nε2  |              | O48       | 2.6          |
| (D) Gly 95 N    |              | O48       | 2.9          |
|                 | W471 (D)     | O48       | 3.2          |
| (D) His 93 N    | W471 (D)     |           | 2.9          |
| (D) Gln 150 Oε1 |              | O3        | 2.7          |
| (D) Thr 97 Oγ1  |              | O10       | 2.8          |
|                 | W433 (D)     | O11       | 3.0          |
| (D) Ala 94 O    | W433 (D)     |           | 2.7          |
| (D) Val 149 O   |              | O11       | 3.2          |
| (D) Trp 98 Nε1  |              | O13       | 3.4          |
|                 | W203 (C)     | O42       | 3.2          |
| (D) Gln150 Oε1  |              | O42       | 3.4          |
| (D) Gln150 Nε2  |              | O42       | 2.6          |
